# Supplementary material
Source: ML conference proceedings conference paper supplement (https://www.ecva.net/papers/eccv_2020/papers_ECCV/html/123470698_ECCV_2020_paper.php)
Supplement: Supplementary file 2 [file 123470698-supp.zip]

Archive with 3 entries (2 files):
- 4158-supp/
- 4158-supp/demo_lisrd_sift.mp4
- 4158-supp/4158-supp.pdf
